# Supplementary material for: CeO2 doped Pt/C as an efficient cathode catalyst for an air-cathode single-chamber microbial fuel cell
Source: Royal Society of Chemistry journal article supplement (doi:10.1039/c6ra04012h), 2016-01-01
Supplement: c6ra04012h1.pdf [file c6ra04012h1.pdf]

## **CeO<sub>2</sub> doped Pt/C as efficient cathode catalyst for air-cathode single-chamber microbial fuel cell**

Ling Li, Mingkun Wang, Ning Cui, Yuedi Ding, Qingling Feng, Xiaowei

Li, Wenming Zhang\*

College of Physics Science and Technology, Hebei University, Baoding,

Hebei province, China. Fax: +86 312 5079473; Tel: +86 312 5079473;

E-mail: [wmzhang@hbu.edu.cn](mailto:wmzhang@hbu.edu.cn)

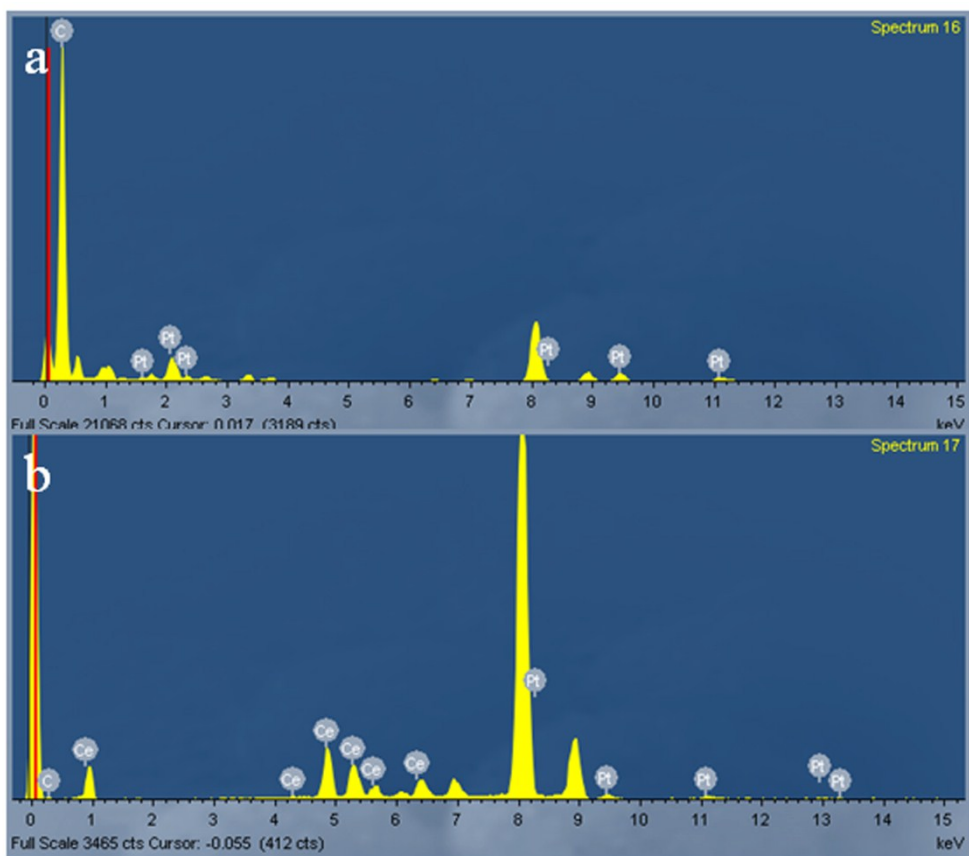

**Fig. S1** The EDS of Pt/C to CeO<sub>2</sub>-Pt/C
